# Supplementary material for: DIGItal Health Literacy after COVID-19 Outbreak among Frail and Non-Frail Cardiology Patients: The DIGI-COVID Study
Source: J Pers Med. 2022 Dec 31;13(1):99. doi: 10.3390/jpm13010099 (PMC9863916; doi:10.3390/jpm13010099)
Supplement: Supplementary file 1 [file jpm-13-00099-s001.zip › jpm-2108142-supplementary.pdf]

# **DIGItal health literacy after COVID-19 outbreak among frail and non-frail cardiology patients: the DIGI-COVID study**

**Marco Vitolo <sup>1,2</sup>, Valentina Ziveri <sup>1</sup>, Giacomo Gozzi <sup>1</sup>, Chiara Busi <sup>1</sup>, Jacopo Francesco Imberti <sup>1,2</sup>, Niccolò Bonini <sup>1,2</sup>, Federico Muto <sup>1</sup>, Davide Antonio Mei <sup>1</sup>, Matteo Menozzi <sup>1</sup>, Marta Mantovani <sup>1</sup>, Benedetta Cherubini <sup>1</sup>, Vincenzo Livio Malavasi <sup>1</sup> and Giuseppe Boriani <sup>1,\*</sup>**

**Table S1.** Edmonton Frail Scale

**Table S2.** Difficulty in using the internet calculated according to the Digital Health Literacy Instrument stratified by frailty status.

**Table S1.** Edmonton Frail Scale

| FRAILTY DOMAIN                                           | ITEM           | Robust<br>EFS ≤ 5<br>(n=212,<br>70.7%) | Pre-frail<br>EFS 6-7<br>(n=47,<br>15.7%) | Frail<br>EFS ≥8<br>(n=41,<br>13.7%) | Total<br>(N=300) |
|----------------------------------------------------------|----------------|----------------------------------------|------------------------------------------|-------------------------------------|------------------|
| <b>Cognition</b>                                         |                |                                        |                                          |                                     |                  |
|                                                          | No errors      | 153/212 (72.2)                         | 17/47 (36.2)                             | 4/41 (9.8)                          | 174/300 (58.0)   |
|                                                          | Minor errors   | 55/212 (25.9)                          | 22/47 (46.8)                             | 26/41 (63.4)                        | 103/300 (34.3)   |
|                                                          | Other errors   | 4/212 (1.9)                            | 8/47 (17)                                | 11/41 (26.8)                        | 23/300 (7.7)     |
| <b>General health status</b>                             |                |                                        |                                          |                                     |                  |
| <i>Hospital admission</i>                                |                |                                        |                                          |                                     |                  |
|                                                          | 0              | 88/212 (41.5)                          | 7/47 (14.9)                              | 10/41 (24.4)                        | 105/300 (35.0)   |
|                                                          | 1-2            | 103/212 (48.6)                         | 27/47 (57.4)                             | 9/41 (22)                           | 139/300 (46.3)   |
|                                                          | >2             | 21/212 (9.9)                           | 13/47 (27.7)                             | 22/41 (53.7)                        | 56/300 (18.7)    |
| <i>Self-perceived health status</i>                      |                |                                        |                                          |                                     |                  |
|                                                          | Excellent/good | 111/212 (52.4)                         | 7/47 (14.9)                              | 0/41 (0)                            | 118/300 (39.3)   |
|                                                          | Fair           | 89/212 (42)                            | 27/47 (57.4)                             | 23/41 (56.1)                        | 139/300 (46.3)   |
|                                                          | Poor           | 12/212 (5.7)                           | 13/47 (27.7)                             | 18/41 (43.9)                        | 43/300 (14.3)    |
| <b>Functional independence</b>                           |                |                                        |                                          |                                     |                  |
| (n activities non-self-efficient)                        | 0-1            | 202/212 (95.3)                         | 34/47 (72.3)                             | 13/41 (31.7)                        | 249/300 (83.0)   |
|                                                          | 2-4            | 10/212 (4.7)                           | 12/47 (25.5)                             | 16/41 (39)                          | 38/300 (12.7)    |
|                                                          | 5-8            | 0/212 (0)                              | 1/47 (2.1)                               | 12/41 (29.3)                        | 13/300 (4.3)     |
| <b>Social support</b>                                    |                |                                        |                                          |                                     |                  |
|                                                          | Always         | 198/212 (93.4)                         | 41/47 (87.2)                             | 34/41 (82.9)                        | 273/300 (91.0)   |
|                                                          | Sometimes      | 13/212 (6.1)                           | 4/47 (8.5)                               | 6/41 (14.6)                         | 23/300 (7.7)     |
|                                                          | Never          | 1/212 (0.5)                            | 2/47 (4.3)                               | 1/41 (2.4)                          | 4/300 (1.3)      |
| <b>Medication use</b>                                    |                |                                        |                                          |                                     |                  |
| <i>Five ore more medications</i>                         | Yes            | 127/212 (59.9)                         | 42/47 (89.4)                             | 39/41 (95.1)                        | 208/300 (69.3)   |
| <i>Forget to take medications</i>                        | Yes            | 26/212 (12.3)                          | 12/47 (25.5)                             | 13/41 (31.7)                        | 51/300 (17.0)    |
| <b>Nutrition</b> ( <i>weight loss</i> )                  | Yes            | 15/212 (7.1)                           | 10/47 (21.3)                             | 12/41 (29.3)                        | 37/300 (12.3)    |
| <b>Mood depressed</b>                                    | Yes            | 24/212 (11.3)                          | 20/47 (42.6)                             | 29/41 (70.7)                        | 73/300 (24.3)    |
| <b>Incontinence</b>                                      | Yes            | 11/212 (5.2)                           | 5/47 (10.6)                              | 16/41 (39)                          | 32/300 (10.7)    |
| <b>Functional performance</b> ( <i>Timed Up and Go</i> ) |                |                                        |                                          |                                     |                  |
|                                                          | 0-10 sec       | 161/212 (75.9)                         | 14/47 (29.8)                             | 5/41 (12.2)                         | 180/300 (60.0)   |
|                                                          | 11-20 sec      | 46/212 (21.7)                          | 27/47 (57.4)                             | 11/41 (26.8)                        | 84/300 (28.0)    |
|                                                          | >20 sec        | 5/212 (2.4)                            | 6/47 (12.8)                              | 25/41 (61)                          | 36/300 (12.0)    |

Legend: EFS, Edmonton Frail Scale.

**Table S2.** Difficulty in using the internet calculated according to the Digital Health Literacy Instrument stratified by frailty status.

|                                      |                                                                                                                             | <b>Robust</b><br>EFS ≤ 5<br>(n=212,<br>70.7%) | <b>Pre-Frail</b><br>EFS 6-7<br>(n=47,<br>15.7%) | <b>Frail</b><br>EFS ≥8<br>(n=41,<br>13.7%) | <b>Total</b><br>(N=300) | <b>p</b> |
|--------------------------------------|-----------------------------------------------------------------------------------------------------------------------------|-----------------------------------------------|-------------------------------------------------|--------------------------------------------|-------------------------|----------|
| <b>Operational skills</b>            | <b>How difficult/very difficult is it for you to...</b>                                                                     |                                               |                                                 |                                            |                         |          |
|                                      | Use the keyboard of a computer (eg, to type words)?                                                                         | 57/212<br>(26.9)                              | 22/47<br>(46.8)                                 | 23/41<br>(56.1)                            | 102/300<br>(34.0)       | <0.001   |
|                                      | Use the mouse (eg, to use the cursor or to click)?                                                                          | 56/212<br>(26.4)                              | 22/47<br>(46.8)                                 | 23/41<br>(56.1)                            | 101/300<br>(33.7)       | <0.001   |
|                                      | Use the buttons or links on websites?                                                                                       | 58/212<br>(27.4)                              | 22/47<br>(46.8)                                 | 23/41<br>(56.1)                            | 103/300<br>(34.3)       | <0.001   |
| <b>Information searching</b>         | <b>When you search the Internet for information on health, how difficult/very difficult is it for you to...</b>             |                                               |                                                 |                                            |                         |          |
|                                      | Make a choice from all the information you find?                                                                            | 70/212<br>(33.0)                              | 20/47<br>(42.6)                                 | 26/41<br>(63.4)                            | 116/300<br>(38.7)       | 0.001    |
|                                      | Use the proper words or search query to find the information you are looking for?                                           | 63/212<br>(29.7)                              | 20/47<br>(42.6)                                 | 24/41<br>(58.5)                            | 107/300<br>(35.7)       | 0.001    |
|                                      | Find the exact information you are looking for?                                                                             | 63/212<br>(29.7)                              | 20/47<br>(42.6)                                 | 26/41<br>(63.4)                            | 109/300<br>(36.3)       | <0.001   |
| <b>Evaluating reliability</b>        | Decide whether the information is reliable or not?                                                                          | 122/212<br>(57.5)                             | 28/47<br>(59.6)                                 | 34/41<br>(82.9)                            | 184/300<br>(61.3)       | 0.009    |
|                                      | Decide whether the information is written with commercial interests?                                                        | 64/212<br>(30.2)                              | 20/47<br>(42.6)                                 | 23/41<br>(56.1)                            | 107/300<br>(35.7)       | 0.004    |
|                                      | Check different websites to see whether they provide the same information?                                                  | 82/211<br>(38.9)                              | 22/47<br>(46.8)                                 | 28/41<br>(68.3)                            | 132/299<br>(44.1)       | 0.002    |
|                                      | Decide if the information you found is applicable to you?                                                                   | 72/212<br>(34.0)                              | 21/47<br>(44.7)                                 | 26/41<br>(63.4)                            | 119/300<br>(39.7)       | 0.001    |
| <b>Determining relevance</b>         | Apply the information you found in your daily life?                                                                         | 75/212<br>(35.4)                              | 22/47<br>(46.8)                                 | 26/41<br>(63.4)                            | 123/300<br>(41.0)       | 0.003    |
|                                      | Use the information you found to make decisions about your health?                                                          | 76/212<br>(35.8)                              | 21/47<br>(44.7)                                 | 27/41<br>(65.9)                            | 124/300<br>(41.3)       | 0.001    |
|                                      |                                                                                                                             |                                               |                                                 |                                            |                         |          |
|                                      |                                                                                                                             |                                               |                                                 |                                            |                         |          |
| <b>Navigation skills</b>             | <b>When you search the Internet for health information, how often/very often does it happen that...</b>                     |                                               |                                                 |                                            |                         |          |
|                                      | You lose track of where you are on a website or the Internet?                                                               | 58/212<br>(27.4)                              | 18/47<br>(38.3)                                 | 25/41<br>(61.0)                            | 101/300<br>(33.7)       | <0.001   |
|                                      | You do not know how to return to a previous page?                                                                           | 79/212<br>(37.3)                              | 23/47<br>(48.9)                                 | 32/41<br>(78.0)                            | 134/300<br>(44.7)       | <0.001   |
|                                      | You click on something and get to see something different than you expected?                                                | 114/212<br>(53.8)                             | 31/47<br>(66.0)                                 | 35/41<br>(85.4)                            | 180/300<br>(60.0)       | 0.001    |
| <b>Adding self-generated content</b> | <b>When typing a message (to your doctor, on a forum, on social media) how difficult/very difficult is it for you to...</b> |                                               |                                                 |                                            |                         |          |
|                                      | Clearly formulate your question or health-related worry?                                                                    | 64/212<br>(30.2)                              | 21/47<br>(44.7)                                 | 24/41<br>(58.5)                            | 109/300<br>(36.3)       | 0.001    |
|                                      | Express your opinion, thoughts, or feelings in writing?                                                                     | 65/212<br>(30.7)                              | 21/47<br>(44.7)                                 | 24/41<br>(58.5)                            | 110/300<br>(36.7)       | 0.001    |
|                                      | Write your message as such, for people to understand exactly what you mean?                                                 | 63/212<br>(29.7)                              | 21/47<br>(44.7)                                 | 24/41<br>(58.5)                            | 108/300<br>(36.0)       | 0.001    |
| <b>Protecting privacy</b>            | <b>When you post a message on a public forum or social media, how often/very often...</b>                                   |                                               |                                                 |                                            |                         |          |
|                                      | Do you find it difficult to judge who can read along?                                                                       | 65/212<br>(30.7)                              | 24/47<br>(51.1)                                 | 23/41<br>(56.1)                            | 112/300<br>(37.3)       | 0.001    |
|                                      | Do you (intentionally or unintentionally) share your own private information?                                               | 61/212<br>(28.8)                              | 24/47<br>(51.1)                                 | 22/41<br>(53.7)                            | 107/300<br>(35.7)       | 0.001    |
|                                      | Do you (intentionally or unintentionally) share some else's private information?                                            | 62/212<br>(29.2)                              | 24/47<br>(51.1)                                 | 22/41<br>(53.7)                            | 108/300<br>(36.0)       | 0.001    |

**Legend:** EFS, Edmonton Frail Score. The table reports the numbers and percentages of respondents who answered 3 or 4 per each question.
